# Supplementary material
Source: Springer Nature journal article supplement (https://www.springermedizin.de/resource/supplementary/13231_2010_20_MOESM4_ESM.pdf/9676346)

**A**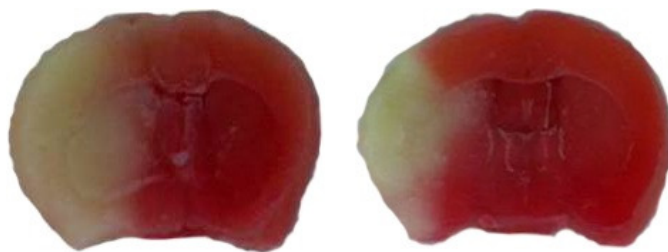**Vehicle****2.0 nmol****B**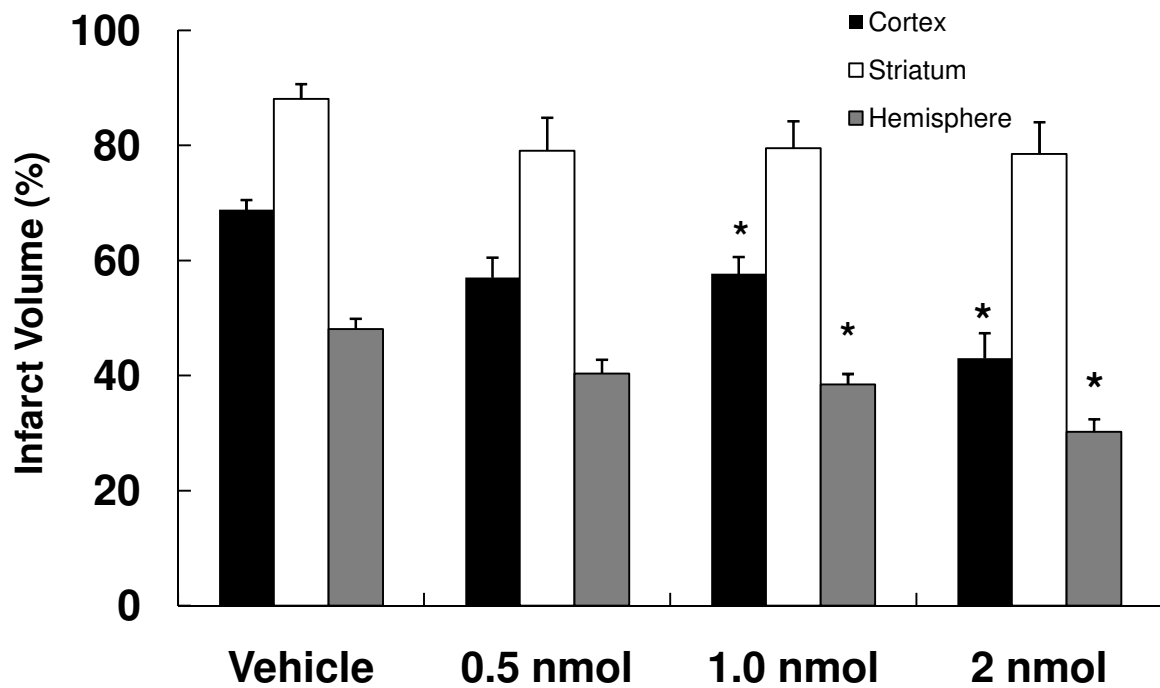**C**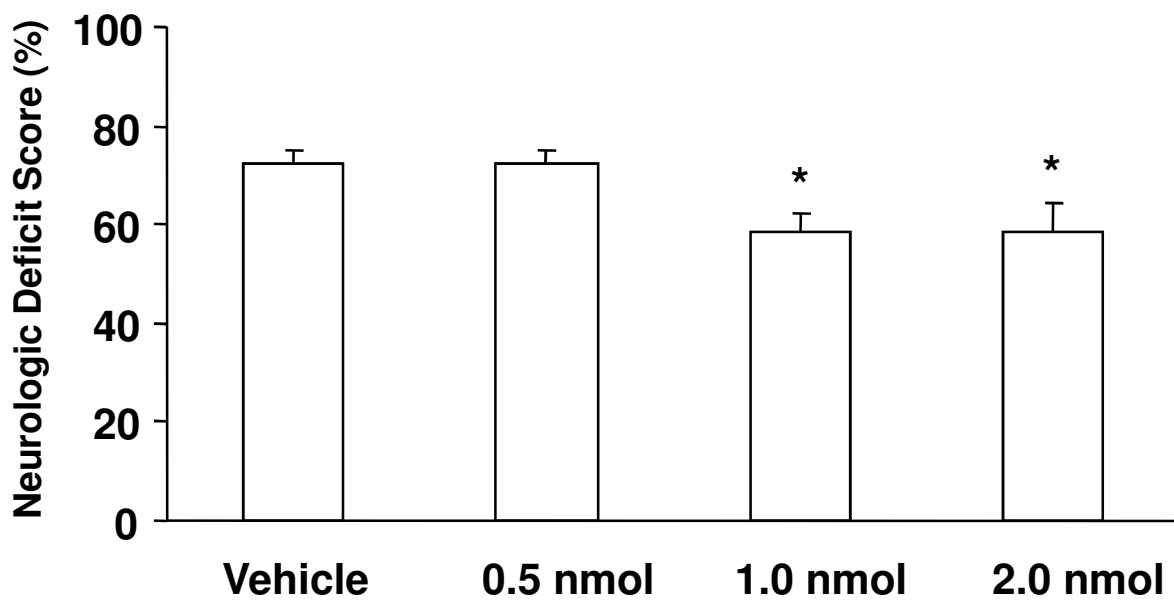

Supplement: MOESM4 [file 9676346]
